# Supplementary material
Source: PubMed Central journal article supplement (PMC3100625)
Supplement: supp_en.2010-1332_en-10-1332_Tabs_1_and_2.pdf [file supp_en.2010-1332_en-10-1332_Tabs_1_and_2.pdf]

**Supplemental Table 1: Maternal plasma levels of cytokines in control and high fat diet sensitive (HFD-S) macaques on gestational day 130**

| Target      | Alternate | Control      | HFD-S        | P value |
|-------------|-----------|--------------|--------------|---------|
| C5a         |           | 2.64 ± 1.06  | 2.15 ± 0.32  | 0.68    |
| CD40 ligand | CD154     | 0.51 ± 0.31  | 0.57 ± 0.12  | 0.87    |
| G-CSF       | CSFB      | 1.09 ± 0.50  | 0.72 ± 0.13  | 0.52    |
| GM-CSF      | CSFa      | 1.33 ± 0.47  | 0.64 ± 0.09  | 0.22    |
| GROa        | CXCL1     | 2.50 ± 0.41  | 0.98 ± 0.19  | 0.03*   |
| I-309       | CCL-1     | 0.84 ± 0.33  | 0.27 ± 0.12  | 0.18    |
| sICAM-1     | CD54      | 0.46 ± 0.23  | 0.14 ± 0.05  | 0.25    |
| IFNg        |           | 0.69 ± 0.14  | 0.16 ± 0.06  | 0.02*   |
| IL-1a       | IL-1F1    | 0.68 ± 0.39  | 0.74 ± 0.13  | 0.89    |
| IL-1β       | IL-1F2    | 0.39 ± 0.26  | 0.58 ± 0.05  | 0.51    |
| IL-ra       | IL-IF3    | 2.76 ± 0.69  | 2.09 ± 0.28  | 0.42    |
| IL-2        |           | 0.86 ± 0.31  | 0.38 ± 0.13  | 0.22    |
| IL-4        |           | 0.55 ± 0.17  | 0.21 ± 0.10  | 0.17    |
| IL-5        |           | 0.38 ± 0.16  | 0.11 ± 0.06  | 0.19    |
| IL-6        |           | 0.34 ± 0.19  | 0.17 ± 0.05  | 0.45    |
| IL-8        |           | 2.38 ± 0.26  | 3.17 ± 2.0   | 0.72    |
| IL-10       |           | 0.49 ± 0.32  | 0.61 ± 0.10  | 0.73    |
| IL-12p70    |           | 0.40 ± 0.28  | 0.58 ± 0.07  | 0.58    |
| IL-13       |           | 2.89 ± 0.75  | 1.92 ± 0.22  | 0.28    |
| IL-16       |           | 1.79 ± 0.47  | 0.96 ± 0.24  | 0.19    |
| IL-17       |           | 0.86 ± 0.24  | 0.32 ± 0.15  | 0.13    |
| IL-17E      |           | 0.84 ± 0.35  | 0.29 ± 0.13  | 0.21    |
| IL-23       |           | 0.58 ± 0.26  | 0.32 ± 0.15  | 0.44    |
| IL-27       |           | 1.17 ± 0.06  | 0.58 ± 0.30  | 0.13    |
| IL-32a      |           | 1.28 ± 0.71  | 0.96 ± 0.06  | 0.68    |
| IP-10       | CXCL10    | 0.70 ± 0.15  | 0.92 ± 0.01  | 0.23    |
| I-TAC       | CXCL11    | 4.14 ± 0.78  | 5.28 ± 0.82  | 0.37    |
| MCP-1       | CCL2      | 0.95 ± 0.30  | 0.57 ± 0.26  | 0.40    |
| MIF         | GIF       | 12.37 ± 1.71 | 6.42 ± 1.59  | 0.06    |
| MIP-1a      | CCL3      | 1.05 ± 0.44  | 0.40 ± 0.19  | 0.24    |
| MIP-1β      | CCL4      | 0.62 ± 0.26  | 0.32 ± 0.14  | 0.37    |
| Serpin E1   | PAI-1     | 9.24 ± 0.29  | 6.88 ± 3.84  | 0.57    |
| RANTES      | CCL5      | 20.76 ± 9.48 | 20.33 ± 8.55 | 0.98    |
| SDF-1       | CXCL12    | 1.72 ± 0.98  | 1.24 ± 0.07  | 0.65    |
| TNFa        |           | 1.16 ± 0.47  | 0.97 ± 0.31  | 0.74    |
| sTREM-1     |           | 1.01 ± 0.43  | 0.56 ± 0.30  | 0.44    |

Maternal serum cytokine array

Proteome Profiler™ Cytokine Array. Values represent the mean ± S.E.M. of arbitrary units.\* indicates a significant change as determined by Student's t test; p < 0.05.

Controls. n = 4; HFD, n = 4.

**Supplemental Table 2: Placenta plasma levels of cytokines in control and high fat diet sensitive (HFD-S) macaques on gestational day 130**

| Target      | Alternate | Control      | HFD-S        | P value |
|-------------|-----------|--------------|--------------|---------|
| C5a         |           | 1.30 ± 0.45  | 2.27 ± 0.71  | 0.31    |
| CD40 ligand | CD154     | 0.73 ± 0.42  | 1.85 ± 0.14  | 0.07    |
| G-CSF       | CSFβ      | 0.81 ± 0.28  | 2.40 ± 0.12  | 0.006*  |
| GM-CSF      | CSFa      | 0.68 ± 0.31  | 1.95 ± 0.13  | 0.02*   |
| GROa        | CXCL1     | 1.06 ± 0.22  | 2.50 ± 0.32  | 0.02*   |
| I-309       | CCL-1     | 0.75 ± 0.10  | 1.54 ± 0.33  | 0.09    |
| sICAM-1     | CD54      | 0.36 ± 0.11  | 0.97 ± 0.23  | 0.08    |
| IFNg        |           | 0.32 ± 0.11  | 0.69 ± 0.28  | 0.29    |
| IL-1a       | IL-1F1    | 0.61 ± 0.42  | 1.83 ± 0.12  | 0.05    |
| IL-1β       | IL-1F2    | 0.30 ± 0.39  | 1.55 ± 0.16  | 0.04*   |
| IL-ra       | IL-IF3    | 2.24 ± 0.37  | 4.00 ± 0.63  | 0.07    |
| IL-2        |           | 0.75 ± 0.15  | 1.80 ± 0.13  | 0.006*  |
| IL-4        |           | 0.58 ± 0.12  | 1.58 ± 0.24  | 0.02*   |
| IL-5        |           | 0.53 ± 0.10  | 1.26 ± 0.37  | 0.13    |
| IL-6        |           | 0.46 ± 0.15  | 0.10 ± 0.37  | 0.25    |
| IL-8        |           | 0.87 ± 0.15  | 1.51 ± 0.56  | 0.33    |
| IL-10       |           | 0.40 ± 0.41  | 1.34 ± 0.08  | 0.09    |
| IL-12p70    |           | 0.24 ± 0.35  | 1.37 ± 0.22  | 0.05    |
| IL-13       |           | 1.64 ± 0.36  | 4.44 ± 0.37  | 0.005*  |
| IL-16       |           | 1.21 ± 0.19  | 3.09 ± 0.26  | 0.004*  |
| IL-17       |           | 0.86 ± 0.19  | 2.07 ± 0.32  | 0.03*   |
| IL-17E      |           | 0.85 ± 0.16  | 1.87 ± 0.44  | 0.09    |
| IL-23       |           | 0.61 ± 0.15  | 1.35 ± 0.50  | 0.23    |
| IL-27       |           | 0.46 ± 0.04  | 1.05 ± 0.28  | 0.10    |
| IL-32a      |           | 0.62 ± 0.46  | 2.20 ± 0.34  | 0.05    |
| IP-10       | CXCL10    | 0.52 ± 0.41  | 1.74 ± 0.17  | 0.05    |
| I-TAC       | CXCL11    | 0.98 ± 0.44  | 3.09 ± 0.19  | 0.01*   |
| MCP-1       | CCL2      | 0.74 ± 0.27  | 2.13 ± 0.15  | 0.01*   |
| MIF         | GIF       | 13.50 ± 2.33 | 23.04 ± 3.58 | 0.09    |
| MIP-1a      | CCL3      | 1.24 ± 0.04  | 1.83 ± 0.39  | 0.20    |
| MIP-1β      | CCL4      | 0.54 ± 0.09  | 1.26 ± 0.45  | 0.19    |
| Serpin E1   | PAI-1     | 4.66 ± 0.96  | 8.13 ± 1.76  | 0.16    |
| RANTES      | CCL5      | 13.91 ± 5.79 | 27.14 ± 3.15 | 0.12    |
| SDF-1       | CXCL12    | 0.93 ± 0.61  | 2.18 ± 0.27  | 0.13    |
| TNFa        |           | 0.49 ± 0.40  | 1.76 ± 0.13  | 0.04*   |
| sTREM-1     |           | 0.75 ± 0.25  | 1.55 ± 0.09  | 0.04*   |

Placenta Cytokine Array

Proteome Profiler™ Cytokine Array. Values represent the mean ± S.E.M. of arbitrary units.\* indicates a significant change as determined by Student's t test; p < 0.05.

Controls. n = 4; HFD, n = 4.
